# Supplementary material for: VOCs and Odor Episodes near the German–Czech Border: Social Participation, Chemical Analyses and Health Risk Assessment
Source: MDPI journal article supplement (doi:10.3390/ijerph19031296), 2022-01-24
Supplement: s1 [file s1]

## Supplementary Information

Table S1. Participant demographic characteristics (average age: CZ: 44, DE: 61)

|                    |        | No. (%) |
|--------------------|--------|---------|
| <b>gender</b>      | male   | 8 (33)  |
|                    | female | 16 (67) |
| <b>age</b>         | 20-29  | 2 (8)   |
|                    | 30-39  | 3 (13)  |
|                    | 40-49  | 6 (25)  |
|                    | 50-59  | 5 (21)  |
|                    | 60-69  | 6 (25)  |
|                    | 70-79  | 2 (8)   |
| <b>nationality</b> | CZ     | 14 (58) |
|                    | DE     | 10 (42) |

## Analytical Methods

### Passive samples VOCs analyses by TD-GC-MS.

The sampled cartridge analyses used a thermal desorption system (TD Unity Markes) coupled to gas chromatograph (HP 6890 Agilent). Thermal desorption of VOC was performed in several steps: The sampling tube was desorbed at 300°C and released VOCs were flushed to a trap. The trap was cooled to -10°C and purged with 30 ml.min<sup>-1</sup> helium flow. It was constituted of two adsorbents Carbotrap C and Carboxpack B. In the second step the trap was heated at 290°C allowing the analytes to be split injected (1:40) with helium into the column. The helium flow was maintained at 0.8 ml.min<sup>-1</sup> and temperature program: 40°C/10°C.min<sup>-1</sup>/230°C, hold 8 min was used. Adsorbent cartridges need to be conditioned at 350°C before use and residual mass average of the mass blank value for each compound of interest was determined by TD-GC-MS analysis.

Gas chromatograph was equipped with an analytical column DB-624 (60 m x 0,25 mm x 1.4 µm) and a mass spectrometer (MS HP5973) which was operated at full scan from 35 to 300 Daltons. The ionization method was electron impact (EI 70eV). VOCs were identified on their retention times and mass spectra and quantified by external calibration. For a few compounds that lacked authentic standard were tentatively identified and were calculated using toluene as a reference compound as below:

$$C_n = A_n/A_{\text{toluene}} \times C_{\text{toluene}} \quad (4)$$

Where:

$A_n$  is the peak area of compound n

$A_{\text{toluene}}$  is the peak area of toluene

$C_n$  is the concentration of compound n (ppbv)

$C_{\text{toluene}}$  is the concentration of toluene (ppbv) which was quantified by external calibration

Analytes were quantified using a calibration curve, based on the analysis of cartridges loaded and positive blank values subtracted from the analytical results. For each level of calibration 1 µl of methanol standard solution or 1 L of gas standard diluted in Silco Can canister was used. Detection limits were calculated from the standard deviation of blank values. For compounds for which blank value cannot be measured, the detection limit was estimated from the ratio between signal / noise observed in the analysis of a cartridge loaded with a mass about 0.3 ng.

### TD-GC-MS analyses of canister samples.

In the laboratory the canister with sample was pressurized at 0.2 MPa with ultra-pure nitrogen and 2 liter samples were concentrated at 100 ml/min using restrictor on sorption tube Tenax TA+ Carbograph TD-1+ Carboxen 1003 for VOCs analyses. Tenax TA + Sulficarb tubes were used for thiols analyses (Markes). The conditions of TD-GC-MS analyses were the same as described above, but in this case splitless injection was used.

### HPLC analyses of carbonyls.

The sampled material was eluted from the cartridges by washing with 2 ml acetonitrile and diluted with 2 ml of ultrapure water and 80 µL of the sample was injected. Analytes were separated on an analytical column Ascentis RP-Amide, 15 cm x 4.6 mm x 3 µm (Supelco) with C<sub>18</sub> guard column 4 mm x 3 mm (Phenomenex). Gradient elution at flow 1.4 ml/min was used from 100% A (acetonitrile/water 40:60), to 100% B (acetonitrile/water 75:25) and detected by HPLC-UV/VIS detector at 365 nm. A hydrazone standard mixing solution containing formaldehyde, acetaldehyde, acetone, acrolein, propionaldehyde, crotonaldehyde, methacrolein, 2-butanone, butanal, isobutanal, benzaldehyde, cyclohexanone, isovaleraldehyde, valeraldehyde, o-tolualdehyde, m-tolualdehyde, p-tolualdehyde, glutaraldehyde, hexanal, dimethyl benzaldehyde, heptanal, octanal, nonanal, decanal (Supelco, Sigma Aldrich) was used for external calibration. Butyraldehyde and isobutyraldehyde, benzaldehyde and cyclohexanone, p-tolualdehyde and m-tolualdehyde could not be separated on the used analytical column and were reported as butyraldehyde, benzaldehyde and p-tolualdehyde respectively.

### Standards used for analysis of other VOCs.

Commercial mixtures of volatile compounds in nitrogen and in methanol and neat standards (dissolved in the laboratory in methanol) were used for calibration. EPA 524 VOC MIX A (0.2 mg/ml methanol, Supelco), Aldehyde standard mix (1 mg/ml methanol, Chromservis), 1,2,3,4-tetramethylbenzene (0.100 mg/ml methanol, Dr. Ehrenstorfer), Ozone precursors – Scott Air (100 ppb/m<sup>3</sup> N<sub>2</sub>, Restek), Mercaptans– Scott Air (1 ppm/m<sup>3</sup> N<sub>2</sub>, Restek), 1,1,2-trichloro-1,2,2-trifluoro ethane, (Freon 113) (1.0 mg/ml MeOH, Supelco), ethyl acetate, butyl acetate, methyl-isobutyl ketone, 2-butanone, limonene, α-pinene, 1-butanol, 2-pentanone, propionic acid, methyl butyrate, benzoic acid, benzene, ethylbenzene, toluene, m-xylene, p-xylene, o-xylene, styrene, pentane, n-butanal, methylcyclopentane, heptane, methylcyclohexane (Sigma Aldrich). Analytical characteristics for quantitative standards are shown below in Table S2.

Table S2. VOC standards used for external calibration.

| <b><u>Carbonyls</u></b> | <b>Calibration range<br/>ng/l</b> | <b>LOQ<br/>(ng/l)</b> | <b>Uncertainty (%)</b> |
|-------------------------|-----------------------------------|-----------------------|------------------------|
| Butanal                 | 1.04-8.33                         | 1.0                   | 8.15                   |
| 3-methylbutanal         | 1.04-8.33                         | 1.0                   | 7.64                   |
| Pentanal                | 1.04-8.33                         | 1.0                   | 13.2                   |
| Hexanal                 | 1.04-8.33                         | 1.0                   | 14.9                   |
| Heptanal                | 1.04-8.33                         | 1.0                   | 13.0                   |
| Benzaldehyde            | 1.04-8.33                         | 4.0                   | 45.8                   |
| Octanal                 | 1.04-8.33                         | 1.0                   | 12.3                   |
| Acetophenone            | 1.04-8.33                         | 20                    | 16.7                   |
| Nonanal                 | 1.04-8.33                         | 2.0                   | 15.5                   |
| Decanal                 | 1.04-8.33                         | 2.0                   | 17.1                   |
| Methyl-isobutyl ketone  | 1-8.33                            | 1.0                   | 15.0                   |
| 2-butanone              | 1-8.33                            | 1.0                   | 15.0                   |
| 1-butanol               | 1-8.33                            | 1.0                   | 15.0                   |
| 2-pentanone             | 1-8.33                            | 1.0                   | 15.0                   |
| <b>Hydrocarbons</b>     |                                   |                       |                        |
| 2-methylpentane         | 0.5-8.33                          | 0.5                   | 32.8                   |
| Cyclopentane            | 0.5-8.33                          | 0.5                   | 3.94                   |
| 3-methylpentane         | 0.5-8.33                          | 0.5                   | 19.2                   |
| 1-Hexene                | 0.5-8.33                          | 0.5                   | 10.1                   |
| 2,4-dimethylpentane     | 0.5-8.33                          | 0.5                   | 15.9                   |
| Methylcyclopentane      | 0.5-8.33                          | 0.5                   | 9.3                    |
| Cyclohexane             | 0.5-8.33                          | 0.5                   | 6.7                    |
| 2-methylhexane          | 0.5-8.33                          | 0.5                   | 14.9                   |
| 2,3-dimethylpentane     | 0.5-8.33                          | 0.5                   | 11.4                   |
| 3-methylhexane          | 0.5-8.33                          | 0.5                   | 19.3                   |
| Benzene                 | 2-8.33                            | 2.0                   | 30.0                   |
| Heptane                 | 0.5-8.33                          | 0.5                   | 16.3                   |
| Methylcyclohexane       | 0.5-8.33                          | 0.5                   | 3.94                   |
| 2,3,4-trimethylpentane  | 0.5-8.33                          | 0.5                   | 5.88                   |
| 2-methylheptane         | 0.5-8.33                          | 0.5                   | 1.01                   |
| 3-methylheptane         | 0.5-8.33                          | 0.5                   | 2.5                    |
| Octane                  | 0.5-8.33                          | 0.5                   | 3.72                   |
| Toluene                 | 0.5-8.33                          | 0.5                   | 10.3                   |
| Ethylbenzene            | 0.5-8.33                          | 0.5                   | 2.6                    |
| Nonane                  | 0.5-8.33                          | 0.5                   | 5.26                   |
| p-Xylene                | 0.5-8.33                          | 0.5                   | 3.82                   |
| Styrene                 | 0.5-8.33                          | 0.5                   | 7.85                   |

|                              |          |     |      |
|------------------------------|----------|-----|------|
| Isopropyl benzene            | 0.5-8.33 | 0.5 | 2.42 |
| Propylbenzene                | 0.5-8.33 | 0.5 | 2.38 |
| Decane                       | 0.5-8.33 | 0.5 | 4.28 |
| 1-ethyl-3-methylbenzene      | 0.5-8.33 | 0.5 | 4.9  |
| 1-ethyl-4-methylbenzene      | 0.5-8.33 | 0.5 | 6.29 |
| 1,3,5-trimethylbenzene       | 0.5-8.33 | 0.5 | 2.42 |
| 1-ethyl-2-methylbenzene      | 0.5-8.33 | 0.5 | 3.75 |
| 1,2,4-trimethylbenzene       | 0.5-8.33 | 0.5 | 4.87 |
| 1,2,3-trimethylbenzene       | 0.5-8.33 | 0.5 | 2.89 |
| 1,3-diethylbenzene           | 0.5-8.33 | 0.5 | 3.81 |
| 1,4-diethylbenzene           | 0.5-8.33 | 0.5 | 2.42 |
| Undecane                     | 0.5-8.33 | 0.5 | 3.2  |
| <b>Esters</b>                |          |     |      |
| Ethylacetate                 | 1-8.33   | 1.0 | 15.0 |
| Butylacetate                 | 1-8.33   | 1.0 | 15.0 |
| Methylbutyrate               | 1-8.33   | 1.0 | 15.0 |
| <b>Terpenes</b>              |          |     |      |
| Limonene                     | 1-8.33   | 1.0 | 15.0 |
| $\alpha$ -Pinene             | 1-8.33   | 1.0 | 15.0 |
| <b>Acids</b>                 |          |     |      |
| Propionic acid               | 1-8.33   | 1.0 | 15.0 |
| Benzoic acid                 | 1-8.33   | 4.0 | 15.0 |
| <b>Halogenated compounds</b> |          |     |      |
| Freon 113                    | 1-8.33   | 1.0 | 15.0 |
| <b>Sulphur compounds</b>     |          |     |      |
| Methanethiol                 | 5.2-41.5 | 2.5 | 30.0 |
| Ethanethiol                  | 5.2-41.5 | 2.5 | 30.0 |
| Dimethylsulfide              | 5.2-41.5 | 2.5 | 30.0 |
| Propanethiol                 | 5.2-41.5 | 2.5 | 30.0 |

### S3. Volatile organic compounds identified in LOM and DND

**LOM:** 2-methylpentane, 3-methylpentane, 2-methylhexane, 3-methylhexane, 2-methylheptane, 3-methylheptane, decane, dodecane, tetradecane, eicosane, 2-methyl-1-propene, 1-butene, 2-butene, 2-methyl-1-pentene, 1-hexene, 1-octene, 2-octene, 4-octene, ethylcyclopentane, 1,3-dimethylcyclohexane, 1,2-dimethylcyclohexane, ethylcyclohexane, 1,1,3-trimethylcyclohexane, decahydronaphthalene, 1,3-dimethylbenzene, 1,3,5-trimethylbenzene, 1,2,3-trimethylbenzene, 1,2,4-trimethylbenzene, 1-ethyl-2-methylbenzene, 1-ethyl-3-methyl benzene, naphthalene, butyl formate, butyric acid, propionic acid, butyl butyrate, ethyl acetate, D-limonene, furan.

**DND:** 2-methylpentane, 3-methylpentane, tetradecane, 2-methyl-1-propene, 2-methyl-1-pentene, 1-hexene, 1-octene, 2-octene, 1,3,5-cykloheptatriene, 1,3-dimethylbenzene, 1-ethyl-3-methylbenzene, 1-ethyl-2-ethylbenzene, 1,3,5-trimethylbenzene, 1,2,3-trimethylbenzene, 1,2,4-trimethylbenzene, butyl formate, butyric acid, propionic acid, butyl butyrate, ethyl acetate, isopropyl alcohol.

Table S3. Canister samples, GC-MS analyses, ou values and CAS numbers.

Analyte names are in the format generated by NIST 02.

| Sampling date | Locality         | Compound                                            | CAS         | µg/m <sup>3</sup> | ppb   | ou     | Σ ou |
|---------------|------------------|-----------------------------------------------------|-------------|-------------------|-------|--------|------|
| 12.1.2018     | Deutscheinsiedel | Ethyl chloride                                      | 000075-00-3 | 5.26              | 1.37  |        | 0.08 |
|               |                  | Ethanol                                             | 000064-17-5 | 40.17             | 10.49 | 0.0202 |      |
|               |                  | Acetic acid, methyl ester                           | 000079-20-9 | 29.55             | 7.71  | 0.0077 |      |
|               |                  | Ethyl acetate                                       | 000141-78-6 | 53.16             | 14.51 | 0.0167 |      |
|               |                  | Trichloromethane                                    | 000067-66-3 | 0.71              | 0.18  | 0      |      |
|               |                  | Ethane, 1-ethoxy-1-methoxy                          | 010471-14-4 | 15.65             | 4.09  |        |      |
|               |                  | Methane, diethoxy-                                  | 000462-95-3 | 15.05             | 3.93  |        |      |
|               |                  | Heptane                                             | 000148-82-5 | 4.67              | 1.12  | 0.0017 |      |
|               |                  | Methyl isobutyl ketone                              | 000108-10-1 | 20.92             | 5.02  | 0.0295 |      |
|               |                  | Toluene                                             | 000108-88-3 | 1.3               | 0.34  | 0.001  |      |
|               |                  | Tetrachloroethylene                                 | 000127-18-4 | 1.35              | 0.35  | 0.0005 |      |
|               |                  | Butane, 1,1,3,4-tetrachloro-1,2,2,3,4,4-hexafluoro- | 000423-38-1 | 93.17             | 11.96 |        |      |
|               |                  | Butane, 1,2,4-trichloro-heptafluoro-                | 000335-45-5 | 14.84             | 1.9   |        |      |
|               |                  | Ethane, 1,1,2-trichloro-1,2,2-trifluoro-            | 000076-13-1 | 146.46            | 18.8  |        |      |
| 10.11.2017    | Háj u Duchcova   | Pentane, 2,2,4-trimethyl-                           | 000540-84-1 | 50.15             | 13.09 | 0.0195 | 0.11 |
|               |                  | Toluene                                             | 000108-88-3 | 2.34              | 0.61  | 0.0018 |      |
|               |                  | Tetrachloroethylene                                 | 000127-18-4 | 0.52              | 0.14  | 0.0002 |      |
|               |                  | 5-Hepten-2-one, 6-methyl-                           | 000110-93-0 | 0.67              | 0.18  |        |      |
|               |                  | Phenol                                              | 000108-95-2 | 1.39              | 0.36  | 0.065  |      |
|               |                  | Ethanol, 2-phenoxy-                                 | 000122-99-6 | 3.23              | 0.84  |        |      |
| 16.11.2017    | Háj u Duchcova   | Hexane, 3-methyl-                                   | 000589-34-4 | 4.46              | 1.07  | 0.0013 | 0.55 |
|               |                  | Formic acid                                         | 000064-18-6 | 2.49              | 0.65  |        |      |

|            |                |                                                                    |              |       |      |        |      |
|------------|----------------|--------------------------------------------------------------------|--------------|-------|------|--------|------|
|            |                | Acetic acid                                                        | 000064-19-7  | 11.1  | 2.9  | 0.4829 |      |
|            |                | Toluene                                                            | 000108-88-3  | 3.6   | 0.94 | 0.0028 |      |
|            |                | Xylene, m+p                                                        | 000106-42-3  | 2.65  | 0.6  | 0.0146 |      |
|            |                | Xylene, o-                                                         | 000108-38-3  | 3.01  | 0.79 |        |      |
|            |                | Phenol                                                             | 000108-95-2  | 1.06  | 0.28 | 0.0496 |      |
| 24.11.2017 | Háj u Duchcova | Benzene                                                            | 000071-43-2  | 9.09  | 2.8  | 0.001  | 0.12 |
|            |                | Cyclohexane, methyl-                                               | 000108-87-2  | 2.53  | 0.62 | 0.0041 |      |
|            |                | Heptane, 2-methyl-                                                 | 000592-27-8  | 0.44  | 0.11 | 0.001  |      |
|            |                | 3-Octene, (Z)-                                                     | 014850-22-7  | 0.31  | 0.08 | 0.0804 |      |
|            |                | Toluene                                                            | 000108-88-3  | 5.25  | 1.37 | 0.0042 |      |
|            |                | Tetrachloroethylene                                                | 000127-18-4  | 0.52  | 0.14 | 0.0002 |      |
|            |                | Xylene, m+p                                                        |              | 4.5   | 1.02 | 0.0249 |      |
|            |                | 1,5-Cyclooctadiene, 1,5-dimethyl-                                  | 003760-14-3  | 1.01  | 0.26 |        |      |
|            |                | Butane, 1,1,3,4-tetrachloro-1,2,2,3,4,4-hexafluoro-                | 000423-38-1  | 0.9   | 0.24 |        |      |
|            |                | Pentanoic acid, 2,2,4-trimethyl-3-carboxyisopropyl, isobutyl ester | 1000140-77-5 | 4.34  | 1.13 |        |      |
| 26.11.2017 | Háj u Duchcova | 2-Pentene, (E)-                                                    | 000646-04-8  | 2.05  | 0.53 |        | 2.47 |
|            |                | 2-Butene, 2-methyl-                                                | 000513-35-9  | 5.85  | 1.53 |        |      |
|            |                | Pentane, 2-methyl-                                                 | 000107-83-5  | 18.15 | 4.74 | 0.0007 |      |
|            |                | Pentane, 3-methyl-                                                 | 000096-14-0  | 15.09 | 4.21 | 0.0005 |      |
|            |                | 1-Pentene, 2-methyl-                                               | 000763-29-1  | 1.51  | 0.39 |        |      |
|            |                | 3-Hexene, (E)-                                                     | 013269-52-8  | 0.52  | 0.14 |        |      |
|            |                | 2-Pentene, 2-methyl-                                               | 000625-27-4  | 0.33  | 0.09 |        |      |
|            |                | Cyclopentane, methyl-                                              | 000096-37-7  | 6.58  | 1.88 | 0.0011 |      |
|            |                | Cyclohexane                                                        | 000110-82-7  | 9.8   | 2.92 | 0.0012 |      |
|            |                | Ethyl acetate                                                      | 000141-78-6  | 1.83  | 0.5  | 0      |      |
|            |                | Hexane, 3-methyl-                                                  | 000589-34-4  | 6.46  | 1.55 | 0.0018 |      |
|            |                | Benzene                                                            | 000071-43-2  | 11.79 | 3.63 | 0.0013 |      |
|            |                | Heptane                                                            | 000148-82-5  | 6.54  | 1.57 | 0.0023 |      |
|            |                | Cyclohexane, methyl-                                               | 000108-87-2  | 2.33  | 0.57 | 0.0038 |      |
|            |                | Cyclopentane, ethyl-                                               | 001640-89-7  | 0.72  | 0.19 |        |      |
|            |                | Heptane, 2-methyl-                                                 | 000592-27-8  | 3.51  | 0.74 | 0.0067 |      |

|           |                |                                          |             |       |       |        |      |
|-----------|----------------|------------------------------------------|-------------|-------|-------|--------|------|
|           |                | Heptane, 4-methyl-                       | 000589-53-7 | 0.45  | 0.12  | 0.0001 |      |
|           |                | Heptane, 3-methyl-                       | 000589-81-1 | 3.37  | 0.71  | 0.0005 |      |
|           |                | Methyl isobutyl ketone                   | 000108-10-1 | 1.52  | 0.36  | 0.0021 |      |
|           |                | 3-Octene                                 | 014850-22-7 | 0.49  | 0.13  |        |      |
|           |                | Toluene                                  | 000108-88-3 | 63.41 | 16.55 | 0.0502 |      |
|           |                | Ethylbenzene                             | 000100-41-4 | 19.73 | 4.47  | 0.0263 |      |
|           |                | Xylene, m+p                              |             | 64.93 | 14.71 | 0.3588 |      |
|           |                | Benzene, propyl-                         | 000103-65-1 | 5.4   | 1.08  |        |      |
|           |                | Benzene, 1-ethyl-3-methyl-               | 000620-14-4 | 14.64 | 2.93  | 0.1628 |      |
|           |                | Benzene, 1-ethyl-4-methyl-               | 000622-96-8 | 4.2   | 0.84  | 0.0101 |      |
|           |                | Benzene, 1,3,5-trimethyl-                | 000108-67-8 | 2.9   | 0.58  | 0.0034 |      |
|           |                | Benzene, 1-ethyl-2-methyl-               | 000611-14-3 | 5.25  | 1.05  | 0.0142 |      |
|           |                | Benzene, 1,2,4-trimethyl                 | 000095-63-6 | 22.34 | 4.47  | 0.0373 |      |
|           |                | Benzene, 1,2,3-trimethyl                 | 000526-73-8 | 5.55  | 1.11  |        |      |
|           |                | Benzene, 1,3-diethyl-                    | 000141-93-5 | 4.86  | 0.87  | 0.0124 |      |
|           |                | Benzene, 1,4-diethyl-                    | 000105-05-5 | 3.85  | 0.69  | 1.7692 |      |
|           |                | Benzene, 4-ethyl-1,2-dimethyl-           | 000934-80-5 | 1.9   | 0.5   |        |      |
|           |                | Benzene, 1-ethyl-2,3-dimethyl-           | 000933-98-2 | 1.06  | 0.28  |        |      |
|           |                | Benzene, 1,2,4,5-tetramethyl-            | 000095-93-2 | 1.03  | 0.27  |        |      |
|           |                | Ethane, 1,1,2-trichloro-1,2,2-trifluoro- | 000076-13-1 | 6.03  | 0.77  |        |      |
| 3.12.2017 | Háj u Duchcova | Toluene                                  | 000108-88-3 | 3.52  | 0.92  | 0.003  | 0    |
| 1.1.2018  | Háj u Duchcova | Heptane                                  | 000148-82-5 | 2.79  | 0.67  | 0.001  | 2.23 |
|           |                | Toluene                                  | 000108-88-3 | 4.21  | 1.1   | 0.0033 |      |
|           |                | Tetrachloroethylene                      | 000127-18-4 | 1.04  | 0.27  | 0.0004 |      |
|           |                | Hexanal                                  | 000124-19-6 | 1.1   | 0.264 | 0.94   |      |
|           |                | Xylene, m+p                              |             | 4.81  | 1.09  | 0.0266 |      |
|           |                | D-Limonene                               | 005989-27-5 | 5.23  | 0.92  | 0.0243 |      |
|           |                | Nonanal                                  | 000124-19-6 | 2.5   | 0.42  | 1.2432 |      |
| 11.1.2018 | Háj u Duchcova | Butane, 2-methyl-                        | 000078-78-4 | 3.86  | 1.01  | 0.0008 | 0.01 |
|           |                | 1-Hexene                                 | 000592-41-6 | 3.88  | 1.11  | 0.0079 |      |

|            |                |                                                  |             |        |       |        |      |
|------------|----------------|--------------------------------------------------|-------------|--------|-------|--------|------|
|            |                | Trichloromethane                                 | 000067-66-3 | 1.32   | 0.35  | 0.0001 |      |
|            |                | Cyclohexane, 1,2-dimethyl-, trans-               | 006876-23-9 | 1.79   | 0.47  |        |      |
|            |                | Toluene                                          | 000108-88-3 | 5.17   | 1.35  | 0.0041 |      |
|            |                | Cyclohexene, 1-methyl-4-(1-methylethenyl)-, (S)- | 005989-54-8 | 1.17   | 0.31  |        |      |
| 7.3.2018   | Háj u Duchcova | 2-Butanone                                       | 000078-93-3 | 3.38   | 1.13  | 0.0403 | 3.62 |
|            |                | Methyl isobutyl ketone                           | 000108-10-1 | 1.63   | 0.39  | 0.0023 |      |
|            |                | Pyridine                                         | 000110-86-1 | 2.2    | 0.57  | 0.0091 |      |
|            |                | Toluene                                          | 000108-88-3 | 2.26   | 0.59  | 0.0018 |      |
|            |                | Tetrachloroethylene                              | 000127-18-4 | 0.52   | 0.14  | 0.0002 |      |
|            |                | Hexanal                                          | 000066-25-1 | 1.21   | 0.29  | 1.0376 |      |
|            |                | Xylene, m+p                                      |             | 2.96   | 0.67  | 0.0163 |      |
|            |                | Nonanal                                          | 000124-19-6 | 3.05   | 0.52  | 1.5167 |      |
|            |                | Decanal                                          | 000112-31-2 | 2.58   | 0.4   | 0.9927 |      |
| 30.10.2018 | Háj u Duchcova | 2-Butanone                                       | 000078-93-3 | 1.88   | 0.63  | 0.0224 | 0.09 |
|            |                | Heptane, 2,5-dimethyl-                           | 002216-30-0 | 2.6    | 0.68  |        |      |
|            |                | Toluene                                          | 000108-88-3 | 3.26   | 0.85  | 0.0026 |      |
|            |                | 1,3-Dioxane, 2,4-dimethyl-                       | 000766-20-1 | 0.77   | 0.2   |        |      |
|            |                | Tetrachloroethylene                              | 000127-18-4 | 2.55   | 0.67  | 0.0009 |      |
|            |                | Xylene, m+p                                      | 000106-42-3 | 5.3    | 1.2   | 0.0293 |      |
|            |                | Styrene                                          | 000100-42-5 | 3.29   | 0.76  | 0.0217 |      |
|            |                | 1,3,5,7-Cyclooctatetraene                        | 000629-20-9 | 3      | 0.78  |        |      |
|            |                | 1R- $\alpha$ -Pinene                             | 007785-70-8 | 1.05   | 0.19  | 0.0103 |      |
|            |                | Benzene, 1,2,4-trimethyl-                        | 000095-63-6 | 2.03   | 0.53  | 0.0044 |      |
| 8.2.2017   | Kühnheide      | 1,4-Pentadiene                                   | 000591-93-5 | 1.55   | 0.41  |        | 1.93 |
|            |                | Toluene                                          | 000108-88-3 | 1.47   | 0.38  | 0.0012 |      |
|            |                | Tetrachloroethylene                              | 000127-18-4 | 2.54   | 0.37  | 0.0005 |      |
|            |                | Styrene                                          | 000100-42-5 | 5.04   | 1.16  | 0.0333 |      |
|            |                | Limonene                                         | 000138-86-3 | 0.9    | 0.16  | 0.0042 |      |
|            |                | Decanal                                          | 000112-31-2 | 4.91   | 0.76  | 1.8899 |      |
|            |                | Ethanol                                          | 000064-17-5 | 205.28 | 53.58 | 0.103  |      |
|            |                | Methane, dimethoxy-                              | 000109-87-5 | 18.55  | 4.84  |        |      |
|            |                | Ethane, 1,1-dimethoxy-                           | 000534-15-6 | 6.72   | 1.75  |        |      |
|            |                | Ethyl acetate                                    | 000141-78-6 | 11.46  | 3.13  | 0.0036 |      |



|            |          |                                                     |             |       |      |                 |      |
|------------|----------|-----------------------------------------------------|-------------|-------|------|-----------------|------|
|            |          | Ethane, 1-ethoxy-1-methoxy-                         | 010471-14-4 | 19.9  | 5.19 |                 |      |
|            |          | Methane, diethoxy-                                  | 000462-95-3 | 5.36  | 1.4  |                 |      |
|            |          | Benzene                                             | 000071-43-2 | 3.44  | 1.06 | 0.0004          |      |
|            |          | Ethane, 1,1-diethoxy-                               | 000105-57-7 | 6.55  | 1.71 |                 |      |
|            |          | Methyl isobutyl ketone                              | 000108-10-1 | 25.36 | 6.09 | 0.0358          |      |
|            |          | Toluene                                             | 000108-88-3 | 2.45  | 0.64 | 0.0019          |      |
|            |          | Xylene, m+p                                         |             | 2.47  | 0.56 | 0.0137          |      |
|            |          | Styrene                                             | 000100-42-5 | 1.56  | 0.36 | 0.0103          |      |
|            |          | Butane, 1,1,3,4-tetrachloro-1,2,2,3,4,4-hexafluoro- | 000423-38-1 | 13.97 | 1.79 |                 |      |
|            |          | Butane, 1,2,4-trichloro-heptafluoro-                | 000335-45-5 | 5.97  | 0.77 |                 |      |
|            |          | Ethane, 1,1,2-trichloro-1,2,2-trifluoro-            | 000076-13-1 | 28.72 | 3.69 |                 |      |
| 4.2.2017   | Litvínov | Toluene                                             | 000108-88-3 | 1.79  | 0.47 | 0.00141<br>5813 | 2.14 |
|            |          | Propylene glycol                                    | 000057-55-6 | 1.38  | 0.36 |                 |      |
|            |          | Isopropyl alcohol                                   | 000067-63-0 | 15.24 | 3.98 | 0.00015<br>2986 |      |
|            |          | Acetophenone                                        | 000098-86-2 | 1     | 0.2  | 0.10008<br>3229 |      |
|            |          | Decanal                                             | 000112-31-2 | 5.3   | 0.82 | 2.04009<br>283  |      |
|            |          | Ethanol, 2-phenoxy-                                 | 000122-99-6 | 2.92  | 0.76 |                 |      |
| 7.11.2018  | Litvínov | 2-butanon                                           | 000071-36-3 | 1.96  | 0.65 | 0.02            | 0.02 |
|            |          | 1,3-Hexadien-5-yne                                  | 010420-90-3 | 11.24 | 2.93 |                 |      |
|            |          | Toluene                                             | 000108-88-3 | 5.06  | 1.32 | 0               |      |
|            |          | Benzene propanoic acid, octyl ester                 | 037826-57-6 | 2.55  | 0.66 |                 |      |
| 16.11.2017 | Litvínov | Toluene                                             | 000108-88-3 | 4.48  | 1.17 | 0.0035          | 0.02 |
|            |          | Tetrachloroethylene                                 | 000127-18-4 | 0.26  | 0.07 | 0.0001          |      |
|            |          | Xylene, m+p                                         |             | 2.78  | 0.63 | 0.0154          |      |
|            |          | 1,3,6-Octatriene, 3,7-dimethyl-, (Z)-               | 003338-55-4 | 0.67  | 0.17 |                 |      |

|                                 |            |                                                     |             |       |       |         |       |
|---------------------------------|------------|-----------------------------------------------------|-------------|-------|-------|---------|-------|
|                                 |            | Benzene, (2-methyl-1-propenyl)-                     | 000768-49-0 | 2.13  | 0.55  |         |       |
| 16.11.2018<br>One hour<br>later | Litvínov   | Ethanol                                             | 000064-17-5 | 60.18 | 15.71 | 0.0302  | 24.3  |
|                                 |            | 2-Butanone                                          | 000078-93-3 | 7.65  | 2.55  | 0.0911  |       |
|                                 |            | 2-Butanol                                           | 000078-92-2 | 2.06  | 0.54  | 0.0489  |       |
|                                 |            | 1-Butanol                                           | 000071-36-3 | 4.01  | 1.3   | 0.0342  |       |
|                                 |            | Toluene                                             | 000108-88-3 | 5.36  | 1.4   | 0.0042  |       |
|                                 |            | Hexanal                                             | 000066-25-1 | 1.38  | 0.33  | 1.1834  |       |
|                                 |            | Xylene, m+p                                         |             | 3.62  | 0.82  | 0.02    |       |
|                                 |            | Octanal                                             | 000124-13-0 | 1.22  | 0.23  | 22.8851 |       |
|                                 |            | Butane, 1,2,3,4-tetrachloro-1,1,2,3,4,4-hexafluoro- | 000375-45-1 | 8.78  | 1.13  |         |       |
|                                 |            | Ethane, 1,1,2-trichloro-1,2,2-trifluoro-            | 000076-13-1 | 3.37  | 0.43  |         |       |
| 8.2.2017                        | Marienberg | Pentane, 2-methyl-                                  | 000107-83-5 | 2.72  | 0.76  | 0.0001  | 26.09 |
|                                 |            | Pentane, 3-methyl-                                  | 000096-14-0 | 7.38  | 2.06  | 0.0002  |       |
|                                 |            | Hexane, 2-methyl-                                   | 000591-76-4 | 2.17  | 0.52  | 0.0012  |       |
|                                 |            | Hexane, 3-methyl-                                   | 000589-34-4 | 2.58  | 0.62  | 0.0007  |       |
|                                 |            | Toluene                                             | 000108-88-3 | 2.68  | 0.7   | 0.0021  |       |
|                                 |            | Heptane, 3-methylene-                               | 001632-16-2 | 1.867 | 0.487 | 0.0003  |       |
|                                 |            | Hexanal                                             | 000066-25-1 | 1.46  | 0.35  | 1.2522  |       |
|                                 |            | Tetrachloroethylene                                 | 000127-18-4 | 1.68  | 0.24  | 0.0003  |       |
|                                 |            | 1-Octene, 4-methyl-                                 | 013151-12-7 | 0.655 | 0.171 |         |       |
|                                 |            | 4-Nonene                                            | 002198-23-4 | 0.53  | 0.138 |         |       |
|                                 |            | Styrene                                             | 000100-42-5 | 1.94  | 0.45  | 0.0128  |       |
|                                 |            | Nonane                                              | 000111-84-2 | 1.39  | 0.26  | 0.0001  |       |
|                                 |            | $\alpha$ -Pinene                                    | 000080-56-8 | 1.24  | 0.22  | 0.0122  |       |
|                                 |            | Octanal                                             | 000124-13-0 | 1.06  | 0.2   | 19.8835 |       |
|                                 |            | Limonene                                            | 000138-86-3 | 1.68  | 0.3   | 0.0078  |       |
|                                 |            | Acetophenone                                        | 000098-86-2 | 1.34  | 0.27  | 0.1341  |       |
|                                 |            | Undecane                                            | 001120-21-4 | 1.43  | 0.22  | 0.0003  |       |
|                                 |            | Nonanal                                             | 000124-19-6 | 3.62  | 0.61  | 1.8002  |       |
|                                 |            | Dodecane                                            | 000112-40-3 | 1.44  | 0.16  | 0.0015  |       |
|                                 |            | Decanal                                             | 000112-31-2 | 7.74  | 1.19  | 2.9793  |       |
| 23.1.2018                       | Neuhausen  | Toluene                                             | 000108-88-3 | 2.53  | 0.66  | 0.002   | 0.06  |

|           |           |                                                             |             |        |        |         |       |
|-----------|-----------|-------------------------------------------------------------|-------------|--------|--------|---------|-------|
|           |           | Xylene, m+p                                                 |             | 3.18   | 0.72   | 0.0176  |       |
|           |           | Styrene                                                     | 000100-42-5 | 5.89   | 1.36   | 0.0389  |       |
|           |           | D-Limonene                                                  | 005989-27-5 | 1.32   | 0.23   | 0.0061  |       |
|           |           | Ethane, 1,1,2-trichloro-<br>1,2,2-trifluoro-                | 000076-13-1 | 9.9    | 1.27   |         |       |
|           |           | Butane, 1,1,3,4-<br>tetrachloro-1,2,2,3,4,4-<br>hexafluoro- | 000423-38-1 | 9.5    | 1.22   |         |       |
| 10.3.2018 | Neuhausen | Propane                                                     | 000074-98-6 | 111.86 | 29.2   | 0       | 43.49 |
|           |           | Isobutane                                                   | 000075-28-5 | 144.61 | 37.75  |         |       |
|           |           | Butane                                                      | 000106-97-8 | 360.92 | 94.21  | 0.0001  |       |
|           |           | Ethanol                                                     | 000064-17-5 | 299.89 | 78.28  | 0.1505  |       |
|           |           | Toluene                                                     | 000108-88-3 | 2.38   | 0.62   | 0.0019  |       |
|           |           | Tetrachloroethylene                                         | 000127-18-4 | 0.72   | 0.19   | 0.0002  |       |
|           |           | Hexanal                                                     | 000066-25-1 | 1.42   | 0.34   | 1.2177  |       |
|           |           | Dimethyl sulfoxide                                          | 000067-68-5 | 0.46   | 0.12   |         |       |
|           |           | 1R- $\alpha$ -Pinene                                        | 007785-70-8 | 2.26   | 0.4    | 0.0222  |       |
|           |           | Decane                                                      | 000124-18-5 | 1.33   | 0.35   | 0.0006  |       |
|           |           | $\beta$ -Pinene                                             | 000127-91-3 | 1.11   | 0.29   | 0.0088  |       |
|           |           | Octanal                                                     | 000124-13-0 | 2.02   | 0.38   | 37.8911 |       |
|           |           | D-Limonene                                                  | 005989-27-5 | 8.54   | 1.51   | 0.0397  |       |
|           |           | Eucalyptol                                                  | 000470-82-6 | 6.81   | 1.78   |         |       |
|           |           | Nonanal                                                     | 000124-19-6 | 3.84   | 0.65   | 1.9096  |       |
|           |           | Decanal                                                     | 000112-31-2 | 5.84   | 0.9    | 2.247   |       |
| 24.3.2018 | Neuhausen | Butane, 2-methyl-                                           | 000078-78-4 | 608.15 | 158.74 |         | 10.16 |
|           |           | Ethanol                                                     | 000064-17-5 | 487.74 | 127.31 | 0.2448  |       |
|           |           | 2-Pentene                                                   | 000109-68-2 | 177.32 | 46.28  | 0.4628  |       |
|           |           | Cyclopropane, 1,2-<br>dimethyl-, cis-                       | 000930-18-7 | 273.95 | 71.51  |         |       |
|           |           | Pentane, 2-methyl-                                          | 000107-83-5 | 189.92 | 53     | 0.0076  |       |
|           |           | Pentane, 3-methyl-                                          | 000096-14-0 | 354.68 | 98.98  | 0.0111  |       |
|           |           | Hexane                                                      | 000110-54-3 | 228.83 | 63.86  | 0.0426  |       |
|           |           | 2-Hexene                                                    | 000592-43-8 | 94.48  | 24.66  | 0.1761  |       |
|           |           | 2-Pentene, 3-methyl-,<br>(Z)-                               | 000922-62-3 | 26.3   | 6.86   |         |       |
|           |           | 2-Hexene, (Z)-                                              | 007688-21-3 | 25.58  | 6.68   | 0.0477  |       |

|  |  |                                      |             |        |        |        |
|--|--|--------------------------------------|-------------|--------|--------|--------|
|  |  | 2-Pentene, 3-methyl-                 | 000922-61-2 | 57.72  | 15.07  |        |
|  |  | Cyclopentane, methyl-                | 000096-37-7 | 212.41 | 60.7   | 0.0357 |
|  |  | Cyclopentene, 1-methyl-              | 000693-89-0 | 48.93  | 12.77  |        |
|  |  | Hexane, 2-methyl-                    | 000591-76-4 | 109.16 | 26.2   | 0.0624 |
|  |  | Hexane, 3-methyl-                    | 000589-34-4 | 101.07 | 24.26  | 0.0289 |
|  |  | Benzene                              | 000071-43-2 | 95.75  | 29.48  | 0.0109 |
|  |  | Heptane                              | 000142-82-5 | 120.5  | 28.92  | 0.0432 |
|  |  | 3-Methyl-3-hexene                    | 003404-65-7 | 67.37  | 17.58  |        |
|  |  | (Z)-2-Heptene                        | 006443-92-1 | 17.89  | 4.67   |        |
|  |  | Cyclopropane,<br>trimethylmethylene- | 034462-28-7 | 10.72  | 2.8    |        |
|  |  | Hexane, 2,5-dimethyl-                | 000592-13-2 | 19.18  | 5.01   |        |
|  |  | Hexane, 2,4-dimethyl-                | 000589-43-5 | 30.86  | 8.05   |        |
|  |  | Cyclohexane, methyl-                 | 000108-87-2 | 90.07  | 22.06  |        |
|  |  | Pentane, 2,3,4-trimethyl-            | 000565-75-3 | 23.94  | 5.04   |        |
|  |  | Heptane, 2-methyl-                   | 000592-27-8 | 77.51  | 16.32  |        |
|  |  | Heptane, 3-methyl-                   | 000589-81-1 | 76.37  | 16.08  |        |
|  |  | Cyclohexene, 1-methyl-               | 000591-49-1 | 13.35  | 3.48   |        |
|  |  | Cyclohexane, 1,4-<br>dimethyl-, cis- | 000624-29-3 | 19.04  | 4.97   |        |
|  |  | Toluene                              | 000108-88-3 | 503.57 | 131.4  | 0.3983 |
|  |  | Heptane, 2,6-dimethyl-               | 001072-05-5 | 12.49  | 3.26   |        |
|  |  | Heptane, 2,5-dimethyl-               | 002216-30-0 | 22.74  | 5.93   |        |
|  |  | Cyclopentane, propyl-                | 002040-96-2 | 11.88  | 3.1    |        |
|  |  | Cyclohexane, ethyl-                  | 001678-91-7 | 77.41  | 20.21  |        |
|  |  | Heptane, 2,4-dimethyl-               | 002213-23-2 | 52.02  | 13.58  |        |
|  |  | Octane, 3-methyl-                    | 002216-33-3 | 29.53  | 7.71   |        |
|  |  | Ethylbenzene                         | 000100-41-4 | 207.84 | 47.08  | 0.2769 |
|  |  | Xylene, m+p                          |             | 525.55 | 119.06 | 2.9039 |
|  |  | Styrene                              | 000100-42-5 | 10.57  | 2.44   | 0.0697 |
|  |  | Benzene, (1-<br>methylethyl)-        | 000098-82-8 | 42.78  | 11.17  |        |
|  |  | Nonane, 3-methyl-                    | 005911-04-6 | 8.81   | 2.3    |        |
|  |  | Benzene, propyl-                     | 000103-65-1 | 68.57  | 13.72  | 3.6105 |
|  |  | Benzene, 1-ethyl-3-<br>methyl        | 000620-14-4 | 157.03 | 31.42  |        |

|            |             |                                      |              |        |        |        |     |
|------------|-------------|--------------------------------------|--------------|--------|--------|--------|-----|
|            |             | Benzene, 1-ethyl-4-methyl            | 000622-96-8  | 58.88  | 11.78  |        |     |
|            |             | 1R- $\alpha$ -Pinene                 | 007785-70-8  | 5.86   | 1.03   | 0.0575 |     |
|            |             | Benzene, 1,3,5-trimethyl-            | 000108-67-8  | 67.07  | 13.42  |        |     |
|            |             | Benzene, 1-ethyl-2-methyl            | 000611-14-3  | 68.37  | 13.68  |        |     |
|            |             | Benzene, 1,2,4-trimethyl-            | 000095-63-6  | 224.71 | 44.96  | 0.3747 |     |
|            |             | Benzene, (1-methylpropyl)-           | 000135-98-8  | 16.21  | 4.23   |        |     |
|            |             | Benzene, 1-methyl-2-(1-methylethyl)- | 000527-84-4  | 27.99  | 7.31   |        |     |
|            |             | Benzene, 1,2,3-trimethyl-            | 000-526-73-8 | 63.27  | 12.66  | 0.0745 |     |
|            |             | Benzene, 1-methyl-3-propyl-          | 001074-43-7  | 34.31  | 8.96   |        |     |
|            |             | Benzene, 1,2-diethyl-                | 000135-01-3  | 6.65   | 1.73   |        |     |
|            |             | Benzene, 1-methyl-4-propyl-          | 001074-55-1  | 12.86  | 3.36   |        |     |
|            |             | Benzene, 1-ethyl-2,4-dimethyl-       | 000874-41-9  | 33.58  | 8.76   |        |     |
|            |             | Nonanal                              | 000124-19-6  | 2.46   | 0.42   | 1.2233 |     |
|            |             | Benzene, 2-ethyl-1,4-dimethyl-       | 001758-88-9  | 9      | 2.35   |        |     |
|            |             | Benzene, 1,2,4,5-tetramethyl-        | 000095-93-2  | 11.23  | 2.93   |        |     |
|            |             | Benzene, 1,2,3,4-tetramethyl-        | 000488-23-3  | 14.59  | 3.81   |        |     |
|            |             | Benzene, 1-ethenyl-3-ethyl-          | 007525-62-4  | 5.86   | 1.53   |        |     |
|            |             | Benzene, 2-ethenyl-1,4-dimethyl-     | 002039-89-6  | 5.38   | 1.4    |        |     |
| 13.11.2017 | Neurehefeld | Methane, chloro-                     | 000074-87-3  | 122.43 | 31.96  |        | 1.3 |
|            |             | Ethyl chloride                       | 000075-00-3  | 64.64  | 16.87  |        |     |
|            |             | Ethanol                              | 000064-17-5  | 740.63 | 193.32 | 0.3718 |     |
|            |             | Methane, dimethoxy-                  | 000109-87-5  | 100.15 | 26.14  |        |     |
|            |             | Acetic acid, methyl ester            | 000079-20-9  | 219.84 | 57.38  | 0.0574 |     |
|            |             | Ethane, 1,1-dimethoxy-               | 000534-15-6  | 33.16  | 8.66   |        |     |
|            |             | Ethyl acetate                        | 000141-78-6  | 138.4  | 37.78  | 0.0434 |     |

|            |                   |                                                     |             |        |       |        |      |
|------------|-------------------|-----------------------------------------------------|-------------|--------|-------|--------|------|
|            |                   | Methane, diethoxy-                                  | 000462-95-3 | 52.24  | 13.64 |        |      |
|            |                   | Heptane                                             | 000148-82-5 | 10.33  | 2.48  | 0.0037 |      |
|            |                   | Methyl isobutyl ketone                              | 000108-10-1 | 59.14  | 14.2  | 0.0835 |      |
|            |                   | 2-Butenoic acid, methyl ester, (E)-                 | 000623-43-8 | 1.35   | 0.35  |        |      |
|            |                   | Toluene                                             | 000108-88-3 | 3.98   | 1.04  | 0.0032 |      |
|            |                   | Tetrachloroethylene                                 | 000127-18-4 | 2.63   | 0.69  | 0.0009 |      |
|            |                   | Xylene, m+p                                         |             | 4.33   | 0.98  | 0.0239 |      |
|            |                   | Cyclohexene, 4-ethenyl-1,4-dimethyl-                | 001743-61-9 | 3.43   | 0.9   |        |      |
|            |                   | Butane, 1,1,3,4-tetrachloro-1,2,2,3,4,4-hexafluoro- | 000423-38-1 | 114.43 | 14.69 |        |      |
|            |                   | 1-Propene, 3-chloro-1,1,2,3,3-pentafluoro-          | 000079-47-0 | 2.87   | 0.37  |        |      |
|            |                   | Butane, 1,2,4-trichloro-heptafluoro-                | 000335-45-5 | 24.66  | 3.16  |        |      |
|            |                   | Decanal                                             | 000112-31-2 | 1.84   | 0.28  | 0.7079 |      |
|            |                   | Ethane, 1,1,2-trichloro-1,2,2-trifluoro-            | 000076-13-1 | 249.02 | 31.96 |        |      |
|            |                   |                                                     |             |        |       |        |      |
| 27.12.2017 | Neurehefeld       | Ethanol                                             | 000064-17-5 | 5.34   | 1.39  | 0.0027 | 0.02 |
|            |                   | Toluene                                             | 000108-88-3 | 2.76   | 0.72  | 0.0022 |      |
|            |                   | Xylene, m+p                                         |             | 2.65   | 0.6   | 0.0146 |      |
| 6.2.2018   | Neurehefeld       | Ethyl acetate                                       | 000141-78-6 | 1.58   | 0.43  | 0.0005 | 0.04 |
|            |                   | Butane, 2,2,3,3-tetramethyl-                        | 000594-82-1 | 80.78  | 21.09 |        |      |
|            |                   | Toluene                                             | 000108-88-3 | 2.38   | 0.62  | 0.0019 |      |
|            |                   | Tetrachloroethylene                                 | 000127-18-4 | 3.29   | 0.86  | 0.0011 |      |
|            |                   | Styrene                                             | 000100-42-5 | 6.06   | 1.4   | 0.04   |      |
| 28.11.2017 | Nová Ves v Horách | Ethyl acetate                                       | 000141-78-6 | 1.07   | 0.29  | 0      | 0.2  |
|            |                   | Hexane, 3-methyl-                                   | 000589-34-4 | 3.46   | 0.83  | 0.001  |      |
|            |                   | Heptane                                             | 000148-82-5 | 2.42   | 0.58  | 0.0009 |      |
|            |                   | 1,4-Dioxane                                         | 000123-91-1 | 0.42   | 0.11  |        |      |
|            |                   | Toluene                                             | 000108-88-3 | 2.68   | 0.7   | 0.0021 |      |
|            |                   | Tetrachloroethylene                                 | 000127-18-4 | 8.58   | 2.24  | 0.0029 |      |
|            |                   | Xylene, m+p                                         |             | 3.13   | 0.71  | 0.0173 |      |
|            |                   | 1R- $\alpha$ -Pinene                                | 007785-70-8 | 13.32  | 2.35  | 0.1306 |      |

|            |                      |                                                             |             |       |       |        |      |
|------------|----------------------|-------------------------------------------------------------|-------------|-------|-------|--------|------|
|            |                      | $\beta$ -Pinene                                             | 000127-91-3 | 4.69  | 1.22  | 0.0371 |      |
|            |                      | Dodecane                                                    | 000112-40-3 | 5.31  | 0.75  | 0.0068 |      |
|            |                      | 1-Butene, 4,4-dichloro-<br>1,1,2,3,3,4-hexafluoro-          | 000357-24-4 | 0.25  | 0.06  |        |      |
|            |                      | Butane, 1,1,3,4-<br>tetrachloro-1,2,2,3,4,4-<br>hexafluoro- | 000423-38-1 | 3.57  | 0.93  |        |      |
|            |                      | Butane, 1,2,3,4-<br>tetrachloro-1,1,2,3,4,4-<br>hexafluoro- | 000375-45-1 | 5.06  | 1.32  |        |      |
| 20.11.2018 | Nová Ves v<br>Horách | 2-butanon                                                   | 000078-93-3 | 3.83  | 1.28  | 0.0456 | 2.51 |
|            |                      | 1-Butanol                                                   | 000071-36-3 | 2.73  | 0.88  | 0.0233 |      |
|            |                      | Toluene                                                     | 000108-88-3 | 8.2   | 2.14  | 0.0065 |      |
|            |                      | Xylene, m+p                                                 |             | 4.72  | 1.07  | 0.0261 |      |
|            |                      | Hexanal                                                     | 000066-25-1 | 1.63  | 0.39  | 1.3978 |      |
|            |                      | Nonanal                                                     | 000124-19-6 | 2.03  | 0.34  | 1.0095 |      |
| 22.1.2017  | Olbernhau            | Pentane, 3-methyl-                                          | 000096-14-0 | 1.94  | 0.54  | 0.0001 | 1.24 |
|            |                      | Hexane, 2-methyl-                                           | 000591-76-4 | 1.67  | 0.4   | 0.001  |      |
|            |                      | Hexane, 3-methyl-                                           | 000589-34-4 | 1.08  | 0.26  | 0.0003 |      |
|            |                      | Toluene                                                     | 000108-88-3 | 1.4   | 0.37  | 0.0011 |      |
|            |                      | Benzene, 1-methyl-4-(1-<br>methylethyl)-                    | 000099-87-6 | 1.42  | 0.25  |        |      |
|            |                      | Limonene                                                    | 000138-86-3 | 1.18  | 0.21  | 0.0208 |      |
|            |                      | Decanal                                                     | 000112-31-2 | 2.98  | 0.46  | 1.1471 |      |
|            |                      | Undecanal                                                   | 000112-44-7 | 0.2   | 0.05  | 0.0102 |      |
|            |                      | Dodecanal                                                   | 000112-54-9 | 0.44  | 0.12  | 0.055  |      |
| 12.12.2017 | Olbernhau            | Toluene                                                     | 000108-88-3 | 2.91  | 0.76  | 0.0023 | 0    |
|            |                      | Tetrachloroethylene                                         | 000127-18-4 | 1.43  | 0.37  | 0.0005 |      |
| 9.1.2018   | Olbernhau            | Toluene                                                     | 000108-88-3 | 2.15  | 0.56  | 0.0017 | 0    |
| 15.3.2018  | Olbernhau            | Pentane, 2-methyl-                                          | 000107-83-5 | 6.24  | 1.74  | 0.0002 | 1.92 |
|            |                      | Acetic acid                                                 | 000064-19-7 | 12.95 | 3.38  | 0.5635 |      |
|            |                      | Cyclohexane                                                 | 000110-82-7 | 48.95 | 14.58 | 0.0058 |      |
|            |                      | Toluene                                                     | 000108-88-3 | 2.84  | 0.74  | 0.0022 |      |
|            |                      | Nonanal                                                     | 000124-19-6 | 2.06  | 0.35  | 1.0244 |      |
|            |                      | Decanal                                                     | 000112-31-2 | 0.84  | 0.13  | 0.3232 |      |
| 26.1.2001  | Sayda                | Toluene                                                     | 000108-88-3 | 0.5   | 0.13  | 0.0004 | 0.78 |
|            |                      | Undecane                                                    | 001120-21-4 | 3.51  | 0.54  | 0.0006 |      |

|           |         |                                      |             |       |       |        |       |
|-----------|---------|--------------------------------------|-------------|-------|-------|--------|-------|
| 27.1.2017 | Sayda   | Dodecane                             | 000112-40-3 | 5.03  | 0.56  | 0.0051 | 4.02  |
|           |         | Decanal                              | 000112-31-2 | 2.52  | 0.31  | 0.7698 |       |
|           |         | Toluene                              | 000108-88-3 | 1.05  | 0.27  | 0.0008 |       |
|           |         | Benzene, 1-methyl-4-(1-methylethyl)- | 000099-87-6 | 0.22  | 0.06  |        |       |
|           |         | D-Limonene                           | 005989-27-5 | 1.15  | 0.2   | 0.0203 |       |
|           |         | Acetophenone                         | 000098-86-2 | 1.55  | 0.31  | 0.1551 |       |
|           |         | Undecane                             | 001120-21-4 | 3.57  | 0.55  | 0.0006 |       |
|           |         | Nonanal                              | 000124-19-6 | 3.1   | 0.52  | 1.542  |       |
|           |         | Dodecane                             | 000112-40-3 | 5.84  | 0.65  | 0.0059 |       |
|           |         | Decanal                              | 000112-31-2 | 5.95  | 0.92  | 2.2903 |       |
| 11.1.2017 | Seiffen | 1,3-Butadiene, 2-methyl-             | 000078-79-5 | 3.36  | 0.49  | 0.0102 | 1.01  |
|           |         | 1-Propanol                           | 000071-23-8 | 11.72 | 4.69  | 0.0499 |       |
|           |         | Pentane, 2-methyl-                   | 000107-83-5 | 8.17  | 2.28  | 0.0003 |       |
|           |         | Benzene                              | 000071-43-2 | 2.06  | 0.63  | 0.0002 |       |
|           |         | Hexane, 3-methyl-                    | 000589-34-4 | 5.17  | 1.24  | 0.0015 |       |
|           |         | Toluene                              | 000108-88-3 | 4.36  | 0.63  | 0.0019 |       |
|           |         | Benzene, 1,3-dimethyl-               | 000108-38-3 | 0.53  | 0.08  | 0.0019 |       |
|           |         | Decanal                              | 000112-31-2 | 2.46  | 0.38  | 0.9469 |       |
|           |         |                                      |             |       |       |        |       |
| 1.2.2017  | Seiffen | Toluene                              | 000108-88-3 | 0.46  | 0.12  | 0.0004 | 0     |
| 17.2.2017 | Seiffen | 2-Propenenitrile                     | 000107-13-1 | 9.72  | 2.537 |        | 42.88 |
|           |         | Cyclopentane, methyl-                | 000096-37-7 | 4.06  | 1.16  |        |       |
|           |         | Toluene                              | 000108-88-3 | 7.26  | 1.895 | 0.0057 |       |
|           |         | Hexanal                              | 000066-25-1 | 1.06  | 0.255 | 9.091  |       |
|           |         | Tetrachloroethylene                  | 000127-18-4 | 4.72  | 0.685 | 0.0009 |       |
|           |         | Heptane, 2,4-dimethyl-               | 002213-23-2 | 5.81  | 1.517 |        |       |
|           |         | Hexane, 3-ethyl-                     | 000619-99-8 | 2.46  | 0.641 |        |       |
|           |         | Xylene, m+p                          |             | 0.96  | 0.217 | 0.0043 |       |
|           |         | Styrene                              | 000100-42-5 | 3.92  | 0.905 | 0.0259 |       |
|           |         | Benzaldehyde                         | 000100-52-7 | 4.3   | 0.975 | 5.4139 |       |
|           |         | Octanal                              | 000124-13-0 | 1.12  | 0.21  | 21.009 |       |
|           |         | D-Limonene                           | 005989-27-5 | 1.42  | 0.251 | 0.0066 |       |
|           |         | Undecane, 5,7-dimethyl-              | 017312-83-3 | 4.16  | 1.087 |        |       |
|           |         | Undecane                             | 001120-21-4 | 2.02  | 0.526 | 0.0006 |       |
|           |         | Benzoic acid                         | 000065-85-0 | 7.46  | 1.947 | 4.7478 |       |
|           |         | Decanal                              | 000112-31-2 | 5.1   | 0.785 | 1.9631 |       |



|           |         |                         |             |       |       |         |      |
|-----------|---------|-------------------------|-------------|-------|-------|---------|------|
|           |         | Naphthalene             | 000091-20-3 | 0.36  | 0.068 | 0.6141  |      |
| 21.2.2017 | Seiffen | 2-Propenenitrile        | 000107-13-1 | 4.71  | 1.23  | 0.0002  | 0.85 |
|           |         | Pentane, 3-methyl-      | 000096-14-0 | 2.44  | 0.68  | 0.0001  |      |
|           |         | Cyclopentane, methyl-   | 000096-37-7 | 2.59  | 0.74  | 0.0004  |      |
|           |         | Toluene                 | 000108-88-3 | 5.14  | 1.34  | 0.0041  |      |
|           |         | Tetrachloroethylene     | 000127-18-4 | 3.6   | 0.52  | 0.0007  |      |
|           |         | Hexane, 3-ethyl-        | 000619-99-8 | 1.7   | 0.44  |         |      |
|           |         | Styrene                 | 000100-42-5 | 1.34  | 0.31  | 0.0088  |      |
|           |         | Undecane, 5,7-dimethyl- | 017312-83-3 | 2.47  | 0.64  |         |      |
|           |         | Decanal                 | 000112-31-2 | 2.16  | 0.33  | 0.8314  |      |
| 13.3.2017 | Seiffen | 2-Propenenitrile        | 000107-13-1 | 4.58  | 1.2   |         | 33.4 |
|           |         | Pentane, 2-methyl-      | 000107-83-5 | 2.72  | 0.76  | 0.0001  |      |
|           |         | Pentane, 3-methyl-      | 000096-14-0 | 3.8   | 1.06  | 0.0001  |      |
|           |         | Cyclopentane, methyl-   | 000096-37-7 | 2.38  | 0.68  | 0.0004  |      |
|           |         | Hexane, 2-methyl-       | 000591-76-4 | 3.58  | 0.86  | 0.002   |      |
|           |         | Toluene                 | 000108-88-3 | 4.2   | 1.1   | 0.0033  |      |
|           |         | Hexanal                 | 000066-25-1 | 1.34  | 0.32  | 1.1492  |      |
|           |         | Heptane, 2,4-dimethyl-  | 002213-23-2 | 5.44  | 1.42  |         |      |
|           |         | Octane, 4-methyl-       | 002216-34-4 | 1.64  | 0.43  |         |      |
|           |         | Styrene                 | 000100-42-5 | 4.96  | 1.15  | 0.0327  |      |
|           |         | $\alpha$ -Pinene        | 000080-56-8 | 1.08  | 0.19  | 0.8666  |      |
|           |         | Benzaldehyde            | 000100-52-7 | 5.92  | 1.34  | 7.4536  |      |
|           |         | Octanal                 | 000124-13-0 | 1.08  | 0.2   | 20.2586 |      |
|           |         | Undecane, 4,7-dimethyl- | 017301-32-5 | 3.21  | 0.84  |         |      |
|           |         | Acetophenone            | 000098-86-2 | 4.16  | 0.83  | 0.4163  |      |
|           |         | Benzoic acid            | 000065-85-0 | 2.23  | 0.58  | 1.4187  |      |
|           |         | Decanal                 | 000112-31-2 | 4.66  | 0.72  | 1.7937  |      |
| 27.3.2017 | Seiffen | 2-Propenenitrile        | 000107-13-1 | 16.65 | 4.35  |         | 62.5 |
|           |         | Pentane, 2-methyl-      | 000107-83-5 | 20.5  | 5.72  | 0.0008  |      |
|           |         | Pentane, 3-methyl-      | 000096-14-0 | 23.51 | 6.56  | 0.0007  |      |
|           |         | Cyclopentane, methyl-   | 000096-37-7 | 23.87 | 6.82  | 0.004   |      |
|           |         | Hexane, 2-methyl-       | 000591-76-4 | 14    | 3.36  | 0.008   |      |
|           |         | Benzene                 | 000071-43-2 | 2.98  | 0.92  | 0.0003  |      |
|           |         | Hexane, 3-methyl-       | 000589-34-4 | 22.25 | 5.34  | 0.0064  |      |
|           |         | Heptane, 2-methyl-      | 000592-27-8 | 3.8   | 0.8   | 0.0073  |      |
|           |         | Toluene                 | 000108-88-3 | 14.48 | 3.78  | 0.0115  |      |

|            |         |                           |             |       |      |         |      |
|------------|---------|---------------------------|-------------|-------|------|---------|------|
|            |         | Octane                    | 000111-65-9 | 7.31  | 1.54 | 0.0009  |      |
|            |         | Hexanal                   | 000066-25-1 | 2.78  | 0.67 | 2.3842  |      |
|            |         | Acetic acid, butyl ester  | 000123-86-4 | 5.5   | 1.44 | 0.0897  |      |
|            |         | Tetrachloroethylene       | 000127-18-4 | 23.5  | 5.32 | 0.0069  |      |
|            |         | Heptane, 2,4-dimethyl-    | 002213-23-2 | 27.07 | 7.06 |         |      |
|            |         | 2,4-Dimethyl-1-heptene    | 019549-87-2 | 2.34  | 0.61 |         |      |
|            |         | Heptane, 2,3-dimethyl-    | 003074-71-3 | 1.61  | 0.42 |         |      |
|            |         | Octane, 4-methyl-         | 002216-34-4 | 14.87 | 3.88 |         |      |
|            |         | Ethylbenzene              | 000100-41-4 | 1.74  | 0.39 | 0.0023  |      |
|            |         | Xylene, m+p               |             | 2.5   | 0.57 | 0.0138  |      |
|            |         | Styrene                   | 000100-42-5 | 14.42 | 3.33 | 0.0951  |      |
|            |         | Nonane                    | 000111-84-2 | 4.9   | 0.92 | 0.0004  |      |
|            |         | Heptanal                  | 000111-71-7 | 2.24  | 0.47 | 2.6212  |      |
|            |         | $\alpha$ -Pinene          | 000080-56-8 | 1.42  | 0.25 | 0.0139  |      |
|            |         | Nonane, 2-methyl-         | 000871-83-0 | 5.84  | 1.52 |         |      |
|            |         | Benzene, 1,3,5-trimethyl- | 000108-67-8 | 2.6   | 0.52 | 0.0031  |      |
|            |         | Benzaldehyde              | 000100-52-7 | 6.5   | 1.47 | 8.1839  |      |
|            |         | Decane                    | 000124-18-5 | 5.09  | 0.86 | 0.0014  |      |
|            |         | Octanal                   | 000124-13-0 | 2.04  | 0.38 | 38.2663 |      |
|            |         | Benzene, 1,2,4-trimethyl- | 000095-63-6 | 4.4   | 0.88 | 0.0073  |      |
|            |         | Decane, 4-methyl-         | 002847-72-5 | 6.86  | 1.79 |         |      |
|            |         | Limonene                  | 000138-86-3 | 3.54  | 0.62 | 0.0164  |      |
|            |         | Acetophenone              | 000098-86-2 | 4.68  | 0.94 | 0.4684  |      |
|            |         | Undecane                  | 001120-21-4 | 14.04 | 2.16 | 0.0025  |      |
|            |         | Benzoic acid              | 000065-85-0 | 4.33  | 1.13 | 2.75    |      |
|            |         | Dodecane                  | 000112-40-3 | 11.19 | 1.58 | 0.0144  |      |
|            |         | Decanal                   | 000112-31-2 | 17.22 | 2.65 | 6.6284  |      |
|            |         | Naphthalene               | 000091-20-3 | 0.52  | 0.1  | 0.887   |      |
| 20.10.2017 | Seiffen | Heptane                   | 000148-82-5 | 1.33  | 0.32 | 0.0005  | 0.63 |
|            |         | 1-Butanol                 | 000071-36-3 | 2.26  | 0.73 | 0.0193  |      |
|            |         | Toluene                   | 000108-88-3 | 0.54  | 0.14 | 0.0004  |      |
|            |         | Crotonic acid             | 003724-65-0 | 0.12  | 0.03 |         |      |
|            |         | Styrene                   | 000100-42-5 | 19.23 | 4.44 | 0.1269  |      |
|            |         | Nonanal                   | 000124-19-6 | 0.98  | 0.17 | 0.4873  |      |
| 20.10.2017 | Seiffen | Acetic acid, methyl ester | 000079-20-9 | 48.28 | 12.6 | 0.0126  | 1.16 |
|            |         | 1-Propanol                | 000071-23-8 | 0.9   | 0.23 | 0.0025  |      |

|                   |         |                                                     |             |         |        |        |      |
|-------------------|---------|-----------------------------------------------------|-------------|---------|--------|--------|------|
| one hour<br>later |         | Ethane, 1,1-dimethoxy-                              | 000534-15-6 | 21.79   | 5.69   |        |      |
|                   |         | Ethyl acetate                                       | 000141-78-6 | 221.04  | 60.33  | 0.0693 |      |
|                   |         | Hexane, 2-methyl-                                   | 000591-76-4 | 4.42    | 1.06   | 0.0025 |      |
|                   |         | Methane, diethoxy-                                  | 000462-95-3 | 41.64   | 10.87  |        |      |
|                   |         | Heptane                                             | 000148-82-5 | 45.42   | 10.9   | 0.0163 |      |
|                   |         | Methyl isobutyl ketone                              | 000108-10-1 | 393.78  | 94.55  | 0.5562 |      |
|                   |         | Toluene                                             | 000108-88-3 | 1.99    | 0.52   | 0.0016 |      |
|                   |         | 3-Penten-2-one, 4-methyl-                           | 000141-79-7 | 1.02    | 0.27   |        |      |
|                   |         | Decane                                              | 000124-18-5 | 2.13    | 0.4    | 0.0006 |      |
|                   |         | Ethane, 1,2-dichloro-1,1,2,2-tetrafluoro-           | 000076-14-2 | 69.69   | 8.94   |        |      |
|                   |         | Butane, 1,2,3,4-tetrachloro-1,1,2,3,4,4-hexafluoro- | 000375-45-1 | 200.9   | 25.79  |        |      |
|                   |         | Decanoic acid, nonadecafluoro-                      | 000335-76-2 | 1.38    | 0.36   |        |      |
|                   |         | Butane, 1,2,4-trichloro-heptafluoro-                | 000335-45-5 | 149.28  | 19.16  |        |      |
|                   |         | Butane, 1,1,3,4-tetrachloro-1,2,2,3,4,4-hexafluoro- | 000423-38-1 | 1975.1  | 253.51 |        |      |
|                   |         | Ethane, 1,1,2,2-tetrachloro-1-fluoro-               | 000354-14-3 | 1118.51 | 143.56 |        |      |
|                   |         | Butane, 1,1,2,3,4,4-hexachloro-1,2,3,4-tetrafluoro- | 000375-43-9 | 19.91   | 2.56   |        |      |
|                   |         | Decanal                                             | 000112-31-2 | 1.3     | 0.2    | 0.5002 |      |
|                   |         | Benzaldehyde, 3,4-dimethyl-                         | 005973-71-7 | 2.53    | 0.66   |        |      |
|                   |         | Ethane, 1,1,2-trichloro-1,2,2-trifluoro-            | 000076-13-1 | 1054.84 | 135.39 |        |      |
| 8.11.2017         | Seiffen | Ethyl acetate                                       | 000141-78-6 | 254.28  | 69.41  | 0.0798 | 2.14 |
|                   |         | Acetic acid                                         | 000064-19-7 | 35.86   | 9.36   | 1.5598 |      |
|                   |         | Methane, diethoxy-                                  | 000462-95-3 | 45.96   | 12     |        |      |
|                   |         | Benzene                                             | 000071-43-2 | 11.36   | 2.96   | 0.0011 |      |
|                   |         | Heptane                                             | 000142-82-5 | 37.83   | 9.08   | 0.0136 |      |

|            |         |                                                     |             |         |        |        |       |
|------------|---------|-----------------------------------------------------|-------------|---------|--------|--------|-------|
|            |         | Methyl isobutyl ketone                              | 000108-10-1 | 194.6   | 46.73  | 0.2749 |       |
|            |         | Toluene                                             | 000108-88-3 | 7.51    | 1.96   | 0.0059 |       |
|            |         | Xylene, m+p                                         |             | 5.47    | 1.24   | 0.0302 |       |
|            |         | Styrene                                             | 000100-42-5 | 25.89   | 5.98   | 0.1709 |       |
|            |         | Ethane, 1-chloro-1,1,2,2-tetrafluoro-               | 000354-25-6 | 24.53   | 3.15   |        |       |
|            |         | Butane, 1,1,3,4-tetrachloro-1,2,2,3,4,4-hexafluoro- | 000423-38-1 | 1002.59 | 128.68 |        |       |
|            |         | Ethane, 1,1,2-trichloro-1,2,2-trifluoro-            | 000076-13-1 | 509.95  | 65.45  |        |       |
|            |         | Butane, 1,2,4-trichloro-heptafluoro-                | 000335-45-5 | 59.54   | 7.64   |        |       |
|            |         | Butane, 1,2,3,4-tetrachloro-1,1,2,3,4,4-hexafluoro- | 000375-45-1 | 636.86  | 81.74  |        |       |
| 28.11.2017 | Seiffen | Methane, chloro-                                    | 000074-87-3 | 237.47  | 61.98  |        | 11.61 |
|            |         | Ethane, methoxy-                                    | 000540-67-0 | 56.48   | 14.74  |        |       |
|            |         | Ethyl chloride                                      | 000075-00-3 | 125.08  | 32.65  |        |       |
|            |         | Ethyl ether                                         | 000060-29-7 | 34.51   | 9.01   |        |       |
|            |         | Methane, dimethoxy-                                 | 000109-87-5 | 67.56   | 17.64  |        |       |
|            |         | Acetic acid, methyl ester                           | 000079-20-9 | 242.21  | 63.22  | 0.06   |       |
|            |         | Ethyl acetate                                       | 000141-78-6 | 227.82  | 62.18  | 0.07   |       |
|            |         | Hexane, 3-methyl-                                   | 000589-34-4 | 23.58   | 5.66   | 0.01   |       |
|            |         | Methane, diethoxy-                                  | 000462-95-3 | 101.61  | 26.52  |        |       |
|            |         | Heptane                                             | 000148-82-5 | 22.58   | 5.42   | 0.01   |       |
|            |         | 1-Butanol                                           | 000071-36-3 | 7.24    | 2.35   | 0.06   |       |
|            |         | 2-Propanol, 1-methoxy-                              | 000107-98-2 | 13.42   | 3.5    |        |       |
|            |         | Pentanal                                            | 000110-62-3 | 2.12    | 0.59   | 1.44   |       |
|            |         | Cyclohexane, methyl-                                | 000108-87-2 | 2.37    | 0.58   | 0      |       |
|            |         | Methyl isobutyl ketone                              | 000108-10-1 | 122.48  | 29.41  | 0.17   |       |
|            |         | 2-Butenoic acid, methyl ester, (E)-                 | 000623-43-8 | 5.11    | 1.33   |        |       |
|            |         | Toluene                                             | 000108-88-3 | 5.13    | 1.34   | 0      |       |
|            |         | Acetic acid, butyl ester                            | 000123-86-4 | 155.56  | 32.21  | 2.01   |       |
|            |         | Hexanal                                             | 000066-25-1 | 5.8     | 1.39   | 4.97   |       |

|           |         |                                                     |             |        |        |        |   |
|-----------|---------|-----------------------------------------------------|-------------|--------|--------|--------|---|
|           |         | 2-Butenoic acid, ethyl ester                        | 010544-63-5 | 7.5    | 1.96   |        |   |
|           |         | Ethylbenzene                                        |             | 3.53   | 0.8    | 0      |   |
|           |         | Xylene, m+p                                         |             | 13.24  | 3      | 0.07   |   |
|           |         | 2-Propanol, 1-ethoxy-                               | 001569-02-4 | 2.31   | 0.6    |        |   |
|           |         | 1R- $\alpha$ -Pinene                                | 007785-70-8 | 2.78   | 0.49   | 0.03   |   |
|           |         | 2-Cyclopenten-1-one, 2-methyl-                      | 001120-73-6 | 1.86   | 0.49   |        |   |
|           |         | Benzene, 1,2,4-trimethyl-                           | 000095-63-6 | 5.2    | 1.04   | 0.01   |   |
|           |         | Undecane                                            | 001120-21-4 | 12.22  | 1.88   | 0      |   |
|           |         | Nonanal                                             | 000124-19-6 | 3.8    | 0.64   | 1.89   |   |
|           |         | Decanal                                             | 000112-31-2 | 2.02   | 0.31   | 0.78   |   |
|           |         | Butane, 1,1,3,4-tetrachloro-1,2,2,3,4,4-hexafluoro- | 000423-38-1 | 474.52 | 60.91  |        |   |
|           |         | Butane, 1,2,3,4-tetrachloro-1,1,2,3,4,4-hexafluoro- | 000375-45-1 | 101.54 | 13.03  |        |   |
|           |         | Ethane, 1,2-dichloro-1,1,2,2-tetrafluoro-           | 000076-14-2 | 20.36  | 2.61   |        |   |
|           |         | Butane, 1,2,4-trichloro-heptafluoro-                | 000335-45-5 | 40.66  | 5.22   |        |   |
|           |         | 1-Butene, 4,4-dichloro-1,1,2,3,3,4-hexafluoro-      | 000357-24-4 | 22.63  | 2.9    |        |   |
|           |         | 1-Propene, 3-chloro-1,1,2,3,3-pentafluoro-          | 000079-47-0 | 192.98 | 24.77  |        |   |
|           |         | Ethane, 1,1,2-trichloro-1,2,2-trifluoro-            | 000076-13-1 | 936.4  | 120.19 |        |   |
| 25.1.2018 | Seiffen | Ethyl chloride                                      | 000075-00-3 | 1.46   | 0.38   |        | 3 |
|           |         | Ethanol                                             | 000064-17-5 | 68.24  | 17.81  | 0.0343 |   |
|           |         | Acetic acid, methyl ester                           | 000079-20-9 | 14.3   | 3.73   | 0.0037 |   |
|           |         | Ethane, 1,1-dimethoxy-                              | 000534-15-6 | 0.35   | 0.09   |        |   |
|           |         | Ethyl acetate                                       | 000141-78-6 | 53.16  | 14.51  | 0.0167 |   |
|           |         | Ethane, 1-ethoxy-1-methoxy-                         | 010471-14-4 | 2.28   | 0.59   |        |   |
|           |         | Methane, diethoxy-                                  | 000462-95-3 | 1.05   | 0.27   |        |   |
|           |         | Methyl isobutyl ketone                              | 000108-10-1 | 3.38   | 0.81   | 0.0048 |   |

|           |         |                                                     |             |        |       |        |      |
|-----------|---------|-----------------------------------------------------|-------------|--------|-------|--------|------|
|           |         | Toluene                                             | 000108-88-3 | 1.92   | 0.5   | 0.0015 |      |
|           |         | Propanoic acid, 2-methyl-                           | 000079-31-2 | 0.85   | 0.22  | 0.1473 |      |
|           |         | Acetic acid, butyl ester                            | 000123-86-4 | 209.9  | 43.46 | 2.7161 |      |
|           |         | Ethylbenzene                                        | 000100-41-4 | 3.53   | 0.8   | 0.0047 |      |
|           |         | Xylene, m+p                                         |             | 13.51  | 3.06  | 0.0746 |      |
|           |         | Butane, 1,2,4-trichloro-heptafluoro-                | 000335-45-5 | 367.01 | 47.11 |        |      |
|           |         | Butane, 1,2,3,4-tetrachloro-1,1,2,3,4,4-hexafluoro- | 000375-45-1 | 60.76  | 7.8   |        |      |
|           |         | Ethane, 1,2-dichloro-1,1,2,2-tetrafluoro-           | 000076-14-2 | 3.95   | 0.51  |        |      |
|           |         | Ethane, 1,1,2-trichloro-1,2,2-trifluoro-            | 000076-13-1 | 618.48 | 79.38 |        |      |
|           |         | Butane, 1,1,3,4-tetrachloro-1,2,2,3,4,4-hexafluoro- | 000423-38-1 | 197.52 | 25.35 |        |      |
| 26.1.2018 | Seiffen | Ethane, methoxy-                                    | 000540-67-0 | 4.45   | 1.16  |        | 0.11 |
|           |         | Ethyl chloride                                      | 000075-00-3 | 17.76  | 4.64  |        |      |
|           |         | Ethanol                                             | 000064-17-5 | 73.99  | 19.31 | 0.0371 |      |
|           |         | Ethane, 1,2-diethoxy-                               | 000629-14-1 | 4.8    | 1.25  |        |      |
|           |         | Methane, dimethoxy-                                 | 000109-87-5 | 25.92  | 6.76  |        |      |
|           |         | Acetic acid, methyl ester                           | 000079-20-9 | 51.96  | 13.56 | 0.0136 |      |
|           |         | Hexane                                              | 000110-54-3 | 6.12   | 1.6   | 0.0011 |      |
|           |         | Ethyl Acetate                                       | 000141-78-6 | 47.32  | 12.92 | 0.0148 |      |
|           |         | Methane, diethoxy-                                  | 000462-95-3 | 6.18   | 1.61  |        |      |
|           |         | Heptane                                             | 000148-82-5 | 2.92   | 0.7   | 0.001  |      |
|           |         | Methyl isobutyl ketone                              | 000108-10-1 | 15.42  | 3.7   | 0.0218 |      |
|           |         | Toluene                                             | 000108-88-3 | 2.07   | 0.54  | 0.0016 |      |
|           |         | Acetic acid, butyl ester                            | 000123-86-4 | 1.2    | 0.25  | 0.0155 |      |
|           |         | Butane, 1,1,3,4-tetrachloro-1,2,2,3,4,4-hexafluoro- | 000423-38-1 | 62.88  | 8.07  |        |      |
|           |         | 1-Propene, 3-chloro-1,1,2,3,3-pentafluoro-          | 000079-47-0 | 4.48   | 0.58  |        |      |

|           |         |                                                     |             |        |       |        |      |
|-----------|---------|-----------------------------------------------------|-------------|--------|-------|--------|------|
|           |         | Butane,1,2,4-trichloro-heptafluoro-                 | 000335-45-5 | 10.16  | 1.3   |        |      |
|           |         | Butane, 1,2,3,4-tetrachloro-1,1,2,3,4,4-hexafluoro- | 000375-45-1 | 6.28   | 0.81  |        |      |
|           |         | Ethane, 1,2-dichloro-1,1,2,2-tetrafluoro-           | 000076-14-2 | 0.35   | 0.05  |        |      |
|           |         | 1-Butene, 4,4-dichloro-1,1,2,3,3,4-hexafluoro-      | 000357-24-4 | 4.55   | 0.58  |        |      |
|           |         | Ethane, 1,1,2-trichloro-1,2,2-trifluoro-            | 000076-13-1 | 120.88 | 15.52 |        |      |
| 18.2.2018 | Seiffen | Methane, chloro-                                    | 000074-87-3 | 18.04  | 4.71  |        | 0.12 |
|           |         | Ethane, methoxy-                                    | 000540-67-0 | 4.21   | 1.1   |        |      |
|           |         | Ethyl chloride                                      | 000075-00-3 | 21.54  | 5.62  |        |      |
|           |         | Ethanol                                             | 000064-17-5 | 56.41  | 14.72 | 0.0283 |      |
|           |         | Ethyl ether                                         | 000060-29-7 | 5.12   | 1.34  |        |      |
|           |         | Acetic acid, methyl ester                           | 000079-20-9 | 66.67  | 17.4  | 0.0174 |      |
|           |         | Methylene chloride                                  | 000075-09-2 | 3.31   | 0.86  | 0      |      |
|           |         | Ethyl acetate                                       | 000141-78-6 | 70.04  | 19.12 | 0.022  |      |
|           |         | Ethane, 1-ethoxy-1-methoxy-                         | 010471-14-4 | 20.99  | 5.48  |        |      |
|           |         | Methane, diethoxy-                                  | 000462-95-3 | 10     | 2.61  |        |      |
|           |         | Methyl isobutyl ketone                              | 000108-10-1 | 29.26  | 7.03  | 0.0413 |      |
|           |         | Toluene                                             | 000108-88-3 | 3.68   | 0.96  | 0.0029 |      |
|           |         | Xylene, m+p                                         |             | 2.21   | 0.5   | 0.0122 |      |
|           |         | Ethane, 1,2-dichloro-1,1,2,2-tetrafluoro-           | 000076-14-2 | 2.53   | 0.32  |        |      |
|           |         | Ethane, 1,1-dichloro-1,2,2,2-tetrafluoro-           | 000374-07-2 | 1.9    | 0.24  |        |      |
|           |         | 1-Butene, 4,4-dichloro-1,1,2,3,3,4-hexafluoro-      | 000357-24-4 | 5.18   | 0.66  |        |      |
|           |         | 1-Propene, 3-chloro-1,1,2,3,3-pentafluoro-          | 000079-47-0 | 1.16   | 0.15  |        |      |
|           |         | Butane, 1,1,3,4-tetrachloro-1,2,2,3,4,4-hexafluoro- | 000423-38-1 | 117.85 | 15.13 |        |      |

|          |         |                                                     |             |        |       |        |      |
|----------|---------|-----------------------------------------------------|-------------|--------|-------|--------|------|
|          |         | Butane,1,2,4-trichloro-heptafluoro-                 | 000335-45-5 | 19.87  | 2.55  |        |      |
|          |         | Butane, 1,2,3,4-tetrachloro-1,1,2,3,4,4-hexafluoro- | 000375-45-1 | 11.16  | 1.43  |        |      |
|          |         | Butane, 1,1,2,3,4,4-hexachloro-1,2,3,4-tetrafluoro- | 000375-43-9 | 4.53   | 0.58  |        |      |
|          |         | Ethane, 1,1,2-trichloro-1,2,2-trifluoro-            | 000076-13-1 | 136.96 | 17.58 |        |      |
| 5.3.2018 | Seiffen | Methane, chloro-                                    | 000074-87-3 | 18.04  | 4.71  |        | 0.12 |
|          |         | Ethane, methoxy-                                    | 000540-67-0 | 4.21   | 1.1   |        |      |
|          |         | Ethyl chloride                                      | 000075-00-3 | 21.54  | 5.62  |        |      |
|          |         | Ethanol                                             | 000064-17-5 | 56.41  | 14.72 | 0.0283 |      |
|          |         | Ethyl ether                                         | 000060-29-7 | 5.12   | 1.34  |        |      |
|          |         | Acetic acid, methyl ester                           | 000079-20-9 | 66.67  | 17.4  | 0.0174 |      |
|          |         | Methylene chloride                                  | 000075-09-2 | 3.31   | 0.86  | 0.0000 |      |
|          |         | Ethyl acetate                                       | 000141-78-6 | 70.04  | 19.12 | 0.0220 |      |
|          |         | Ethane, 1-ethoxy-1-methoxy-                         | 010471-14-4 | 20.99  | 5.48  |        |      |
|          |         | Methane, diethoxy-                                  | 000462-95-3 | 10     | 2.61  |        |      |
|          |         | Methyl isobutyl ketone                              | 000108-10-1 | 29.26  | 7.03  | 0.0413 |      |
|          |         | Toluene                                             | 000108-88-3 | 3.68   | 0.96  | 0.0029 |      |
|          |         | Xylene, m+p                                         |             | 2.21   | 0.5   | 0.0122 |      |
|          |         | Ethane, 1,2-dichloro-1,1,2,2-tetrafluoro-           | 000076-14-2 | 2.53   | 0.32  |        |      |
|          |         | Ethane, 1,1-dichloro-1,2,2,2-tetrafluoro-*          | 000374-07-2 | 1.9    | 0.24  |        |      |
|          |         | 1-Butene, 4,4-dichloro-1,1,2,3,3,4-hexafluoro-*     | 000357-24-4 | 5.18   | 0.66  |        |      |
|          |         | 1-Propene, 3-chloro-1,1,2,3,3-pentafluoro-          | 000079-47-0 | 1.16   | 0.15  |        |      |
|          |         | Butane, 1,1,3,4-tetrachloro-1,2,2,3,4,4-hexafluoro- | 000423-38-1 | 117.85 | 15.13 |        |      |
|          |         | Butane,1,2,4-trichloro-heptafluoro-                 | 000335-45-5 | 19.87  | 2.55  |        |      |



|            |         |                                                     |             |        |       |        |      |
|------------|---------|-----------------------------------------------------|-------------|--------|-------|--------|------|
|            |         | Butane, 1,2,3,4-tetrachloro-1,1,2,3,4,4-hexafluoro- | 000375-45-1 | 11.16  | 1.43  |        |      |
|            |         | Butane, 1,1,2,3,4,4-hexachloro-1,2,3,4-tetrafluoro- | 000375-43-9 | 4.53   | 0.58  |        |      |
|            |         | Ethane, 1,1,2-trichloro-1,2,2-trifluoro-            | 000076-13-1 | 136.96 | 17.58 |        |      |
| 6.11.2018  | Seiffen | Ethanol                                             | 000064-17-5 | 101.58 | 26.51 | 0.051  | 3.03 |
|            |         | Ethane, 1,1-dimethoxy-                              | 000534-15-6 | 0.86   | 0.22  |        |      |
|            |         | Ethyl acetate                                       | 000141-78-6 | 5.58   | 1.52  | 0.0018 |      |
|            |         | Ethane, 1-ethoxy-1-methoxy-                         | 010471-14-4 | 7.91   | 2.06  |        |      |
|            |         | Acetic acid, methylethyl ester                      | 000108-21-4 | 19.18  | 5.01  | 0.0313 |      |
|            |         | Methane, diethoxy-                                  | 000462-95-3 | 1.36   | 0.35  |        |      |
|            |         | 1-Butanol                                           | 000071-36-3 | 2.46   | 0.8   | 0.021  |      |
|            |         | Methyl isobutyl ketone                              | 000108-10-1 | 9.6    | 2.31  | 0.0136 |      |
|            |         | Toluene                                             | 000108-88-3 | 4.44   | 1.16  | 0.0035 |      |
|            |         | Acetic acid, butyl ester                            | 000123-86-4 | 124    | 25.67 | 1.6046 |      |
|            |         | Butanoic acid                                       | 000107-92-6 | 0.88   | 0.23  | 1.2114 |      |
|            |         | Nonane                                              | 000111-84-2 | 3.84   | 0.72  | 0      |      |
|            |         | Xylene, m+p                                         |             | 4.86   | 1.1   | 0.0268 |      |
|            |         | Styrene                                             | 000100-42-5 | 9.09   | 2.1   | 0.06   |      |
|            |         | Limonene                                            | 000138-86-3 | 1.24   | 0.22  | 0.0058 |      |
|            |         | Ethane, 1,1,2-trichloro-1,2,2-trifluoro-            | 000076-13-1 | 10.98  | 1.41  |        |      |
| 12.11.2018 | Seiffen | Ethyl acetate                                       | 000141-78-6 | 254.28 | 69.41 | 0.0798 | 2.14 |
|            |         | Acetic acid                                         | 000064-19-7 | 35.86  | 9.36  | 1.5598 |      |
|            |         | Ethane, 1-ethoxy-1-methoxy-                         | 010471-14-4 | 36.29  | 9.47  |        |      |
|            |         | Methane, diethoxy-                                  | 000462-95-3 | 45.96  | 12    |        |      |
|            |         | Benzene                                             | 000071-43-2 | 11.36  | 2.96  | 0.0011 |      |
|            |         | Heptane                                             | 000142-82-5 | 37.83  | 9.08  | 0.0136 |      |
|            |         | Methyl isobutyl ketone                              | 000108-10-1 | 194.6  | 46.73 | 0.2749 |      |
|            |         | Toluene                                             | 000108-88-3 | 7.51   | 1.96  | 0.0059 |      |
|            |         | Xylene, m+p                                         |             | 5.47   | 1.24  | 0.0302 |      |

|            |         |                                                     |             |         |        |        |      |
|------------|---------|-----------------------------------------------------|-------------|---------|--------|--------|------|
|            |         | Styrene                                             | 000100-42-5 | 25.89   | 5.98   | 0.1709 |      |
|            |         | Ethane, 1-chloro-1,1,2,2-tetrafluoro-               | 000354-25-6 | 24.53   | 3.15   |        |      |
|            |         | Butane, 1,1,3,4-tetrachloro-1,2,2,3,4,4-hexafluoro- | 000423-38-1 | 1002.59 | 128.68 |        |      |
|            |         | Butane, 1,2,3,4-tetrachloro-1,1,2,3,4,4-hexafluoro- | 000375-45-1 | 509.95  | 65.45  |        |      |
|            |         | Butane, 1,2,4-trichloro-heptafluoro-                | 000335-45-5 | 59.54   | 7.64   |        |      |
|            |         | Ethane, 1,1,2-trichloro-1,2,2-trifluoro-            | 000076-13-1 | 636.86  | 81.74  |        |      |
| 28.11.2018 | Seiffen | Ethyl acetate                                       | 000141-78-6 | 41.46   | 11.32  | 0.01   | 3.46 |
|            |         | 2-Butanone                                          | 000078-93-3 | 53.46   | 17.83  | 0.64   |      |
|            |         | 1-Butanol                                           | 000071-36-3 | 1.4     | 0.45   | 0.01   |      |
|            |         | Toluene                                             | 000108-88-3 | 12.64   | 3.3    | 0.01   |      |
|            |         | Acetic acid, butyl ester                            | 000123-86-4 | 190.3   | 39.4   | 2.46   |      |
|            |         | Octane, 4-methyl-                                   | 002216-34-4 | 2.64    | 0.69   |        |      |
|            |         | Ethylbenzene                                        | 000100-41-4 | 6.45    | 1.46   | 0.01   |      |
|            |         | Xylene, m+p                                         |             | 22.07   | 5      | 0.12   |      |
|            |         | Styrene                                             | 000100-42-5 | 7.79    | 1.8    | 0.05   |      |
|            |         | Benzene, 1-ethyl-3-methyl-                          | 143314-17-4 | 9.42    | 1.9    | 0.11   |      |
|            |         | Benzene, 1,2,4-trimethyl-                           | 000095-63-6 | 20.69   | 4.14   | 0.03   |      |
|            |         |                                                     |             |         |        |        |      |
| 14.2.2017  | Vřesová | Pentane, 2-methyl-                                  | 000107-83-5 | 2.47    | 0.69   | 0.0001 | 1.11 |
|            |         | Pentane, 3-methyl-                                  | 000096-14-0 | 9.07    | 2.53   | 0.0003 |      |
|            |         | Acetic acid                                         | 000064-19-7 | 3.06    | 0.8    | 0.1332 |      |
|            |         | 1,4-Dioxane                                         | 000123-91-1 | 0.61    | 0.16   |        |      |
|            |         | Toluene                                             | 000108-88-3 | 2.91    | 0.76   | 0.0023 |      |
|            |         | Tetrachloroethylene                                 | 000127-18-4 | 2.26    | 0.33   | 0.0004 |      |
|            |         | Heptane, 2,4-dimethyl-                              | 002213-23-2 | 1.44    | 0.38   |        |      |
|            |         | Octane, 4-methyl-                                   | 002216-34-4 | 0.64    | 0.17   |        |      |
|            |         | Undecane, 4,7-dimethyl-                             | 017301-32-5 | 1.21    | 0.32   |        |      |
|            |         | Decanal                                             | 000112-31-2 | 2.54    | 0.39   | 0.9777 |      |
|            |         | Nonadecane                                          | 000629-92-5 | 0.67    | 0.17   |        |      |
|            |         |                                                     |             |         |        |        |      |
| 30.3.2017  | Vřesová | Toluene                                             | 000108-88-3 | 2.13    | 0.56   | 0.0017 | 1.78 |

|  |  |         |             |      |      |        |  |
|--|--|---------|-------------|------|------|--------|--|
|  |  | Nonanal | 000124-19-6 | 2.01 | 0.34 | 0.9996 |  |
|  |  | Decanal | 000112-31-2 | 2.03 | 0.31 | 0.7814 |  |

Table S4. Hazard Index (HI) for chronic non-carcinogenic effects from exposure to chemicals during the odor episodes near the Czech-German border.

| DATE       | SITE              | HC    | C <sub>3</sub> -C <sub>4</sub> | HAL<br>HC | HCO | OH    | ACIDS | ESTERS | TERP  | 2-PRCN |
|------------|-------------------|-------|--------------------------------|-----------|-----|-------|-------|--------|-------|--------|
| 10.11.2017 | Háj u<br>Duchcova | 0.011 |                                | 0.001     |     | 0.001 | 0.049 |        |       |        |
| 16.11.2017 | Háj u<br>Duchcova | 0.007 |                                |           |     | 0.001 | 0.908 |        |       |        |
| 24.11.2017 | Háj u<br>Duchcova | 0.041 |                                | 0.001     |     |       |       |        |       |        |
| 26.11.2017 | Háj u<br>Duchcova | 0.227 | 0.000                          | 0.000     |     | 0.001 |       | 0.003  |       |        |
| 3.12.2017  | Háj u<br>Duchcova | 0.001 |                                |           |     |       |       |        |       |        |
| 1.1.2018   | Háj u<br>Duchcova | 0.006 |                                | 0.003     |     |       |       |        | 0.002 |        |
| 11.1.2018  | Háj u<br>Duchcova | 0.005 |                                | 0.001     |     |       |       |        |       |        |
| 7.3.2018   | Háj u<br>Duchcova | 0.007 | 0.001                          | 0.001     |     |       |       |        |       |        |
| 30.10.2018 | Háj u<br>Duchcova | 0.015 | 0.000                          | 0.007     |     |       |       |        | 0.000 |        |
| 7.11.2018  | Háj u<br>Duchcova | 0.004 |                                |           |     | 0.001 |       |        |       |        |
| 16.11.2018 | Háj u<br>Duchcova | 0.007 |                                | 0.001     |     | 0.001 |       |        |       |        |
| 8.2.2017   | Kühnheide         | 0.008 |                                | 0.009     |     |       |       | 0.000  | 0.000 |        |
| 4.2.2017   | Litvínov          | 0.001 |                                |           |     | 0.003 |       |        |       |        |
| 16.11.2018 | Litvínov          | 0.005 | 0.001                          | 0.000     |     | 0.007 |       |        |       |        |
| 20.11.2018 | Litvínov          | 0.007 | 0.001                          |           |     | 0.001 |       |        |       |        |
| 8.2.2017   | Marienberg        | 0.016 |                                | 0.006     |     |       |       |        | 0.001 |        |
| 23.1.2018  | Neuhausen         | 0.081 |                                |           |     |       |       |        | 0.001 |        |
| 10.3.2018  | Neuhausen         | 0.003 | 0.048                          | 0.003     |     | 0.043 |       |        | 0.006 |        |

|            |                      |       |       |       |       |       |       |       |       |       |
|------------|----------------------|-------|-------|-------|-------|-------|-------|-------|-------|-------|
| 24.3.2018  | Neuhausen            | 3.960 |       |       |       | 0.071 |       |       | 0.003 |       |
| 13.11.2017 | Neurehefeld          | 0.016 | 0.047 | 1.142 |       | 0.190 |       | 0.415 |       |       |
| 27.12.2017 | Neurehefeld          | 0.005 |       |       |       | 0.001 |       |       |       |       |
| 6.2.2018   | Neurehefeld          | 0.030 |       | 0.012 |       |       |       | 0.003 |       |       |
| 28.11.2017 | Nová Ves v<br>Horách | 0.011 | 0.001 | 0.023 |       |       |       | 0.002 | 0.007 |       |
| 22.1.2017  | Olbernhau            | 0.004 |       |       |       |       |       |       | 0.001 |       |
| 8.11.2017  | Olbernhau            | 0.180 |       |       |       | 0.006 |       | 0.035 | 0.002 |       |
| 28.11.2017 | Olbernhau            | 0.061 | 0.089 | 0.470 | 0.000 | 0.005 |       | 0.557 | 0.001 |       |
| 11.12.2017 | Olbernhau            | 0.022 | 0.012 |       |       | 0.031 |       | 0.028 |       |       |
| 11.12.2017 | Olbernhau            | 0.002 |       | 0.005 |       |       |       |       |       |       |
| 9.1.2018   | Olbernhau            | 0.001 |       |       |       |       |       |       |       |       |
| 15.3.2018  | Olbernhau            | 0.015 |       |       |       |       | 0.075 |       |       |       |
| 26.1.2017  | Sayda                | 0.013 |       |       |       |       |       |       |       |       |
| 27.1.2017  | Sayda                | 0.014 |       |       |       |       |       |       | 0.001 |       |
| 11.1.2017  | Seiffen              | 0.017 |       |       |       | 0.003 |       |       |       |       |
| 1.2.2017   | Seiffen              | 0.000 |       |       |       |       |       |       |       |       |
| 17.2.2017  | Seiffen              | 0.044 |       | 0.017 |       |       |       |       | 0.001 | 0.704 |
| 21.2.2017  | Seiffen              | 0.010 |       | 0.013 |       |       |       |       |       | 0.341 |
| 13.3.2017  | Seiffen              | 0.027 |       |       |       |       |       |       | 0.001 | 0.332 |
| 27.3.2017  | Seiffen              | 0.177 |       | 0.085 | 1.081 |       |       | 0.001 | 0.001 | 1.205 |
| 20.10.2017 | Seiffen              | 0.028 |       |       |       | 0.001 |       |       |       |       |
| 20.10.2017 | Seiffen              | 0.016 | 0.158 | 0.022 |       | 0.051 |       | 0.469 |       |       |
| 25.1.2018  | Seiffen              | 0.022 | 0.002 | 0.033 |       | 0.010 | 0.123 | 0.145 |       |       |
| 26.1.2018  | Seiffen              | 0.003 | 0.007 | 0.259 |       | 0.011 |       | 0.013 |       |       |
| 18.2.2018  | Seiffen              | 0.001 |       |       |       |       |       | 0.098 |       |       |
| 5.3.2018   | Seiffen              | 0.017 | 0.016 | 0.344 |       | 0.008 |       | 0.162 |       |       |
| 6.11.2018  | Seiffen              | 0.028 | 0.004 | 0.000 |       | 0.016 | 0.208 | 0.047 | 0.001 |       |
| 12.11.2018 | Seiffen              | 0.112 | 0.082 | 0.012 |       |       |       | 0.526 |       |       |
| 28.11.2018 | Seiffen              | 0.100 | 0.013 |       |       | 0.001 |       | 0.115 |       |       |
| 14.2.2017  | Vřesová              | 0.008 | 0.001 | 0.006 |       |       |       |       |       |       |
| 30.3.2017  | Vřesová              | 0.001 |       |       |       |       |       |       |       |       |

Abbreviations: **HC**= Complex mixture of aliphatic and aromatic hydrocarbons; **C<sub>3</sub>-C<sub>4</sub>**= C<sub>3</sub>-C<sub>4</sub> hydrocarbons, ketones, esters; **PETROL**= petroleum hydrocarbons; **HAL HC**= halogenated hydrocarbons; **HCO**= aldehydes; **OH**= alcohols; **TERP**= terpenes; **2-PRCN**= 2-propenenitrile.
